# Supplementary material for: MEMS microwell and microcolumn arrays: novel methods for high-throughput cell-based assays
Source: Royal Society of Chemistry journal article supplement (doi:10.1039/c0lc00696c), 2011-01-01
Supplement: c0lc00696c.pdf [file c0lc00696c.pdf]

## Supplementary Information

### Figure S1

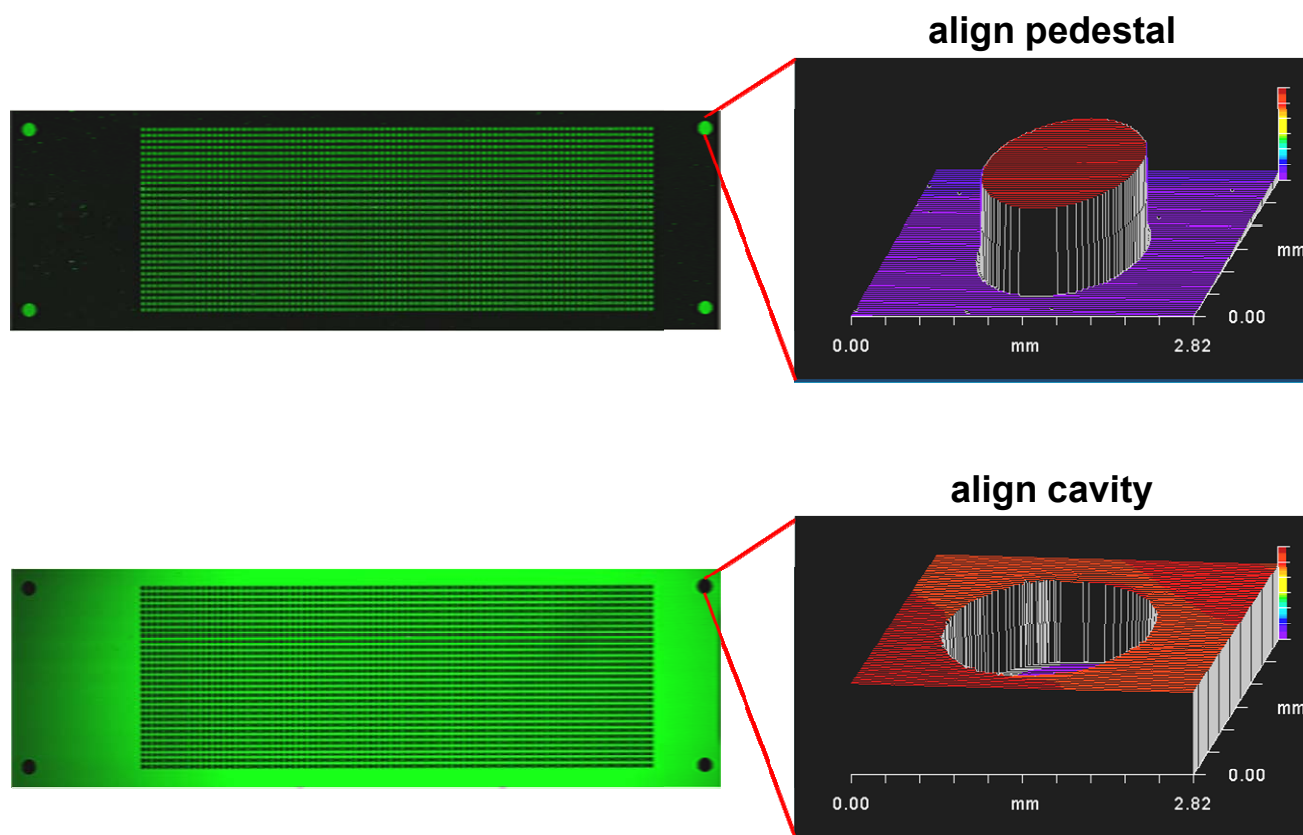

**Figure S1.** Microcolumn to microwell alignment. Structures of MEMS-fabricated microcolumn (upper panel) and microwell arrays (lower panel) were examined by Axon Scanner and ellipsometer measurement. The ellipsometer images showed the 3-D structure of the align pedestals (1.35 mm in diameter, upper right panel) located on the microcolumn array and align cavity (1.5 mm in diameter, lower panel) on the microwell array. The alignment was carried out by matching the four pedestals to the complementary cavities to ensure that the right wells were inserted with the right columns.

## Figure S2

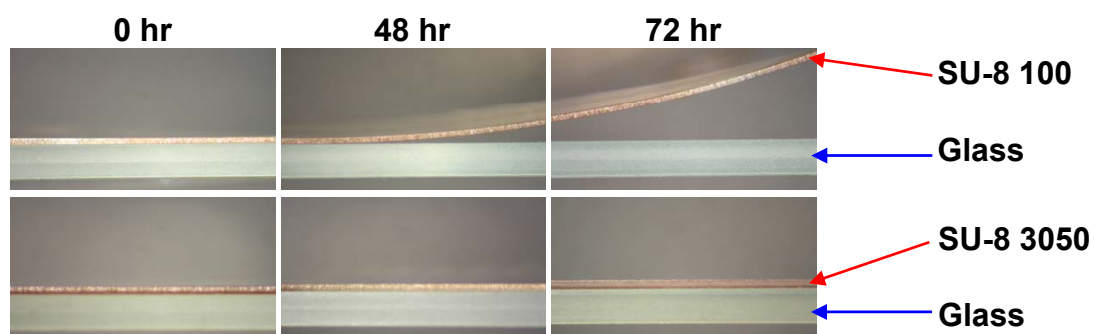

**Figure S2.** Adhesion test of the MEMS microstructures in cell culture medium. The UV-sterilized microwell array chips fabricated with SU-8 3050 or SU-8 100 photoresist films were immersed in culture medium for 2-3 days at 37°C. The microscope photographs showed that SU-8 100 film peeled off from the glass wafer after 48h incubation. SU-8 3050 film remained intact after 72h incubation.

## Figure S3

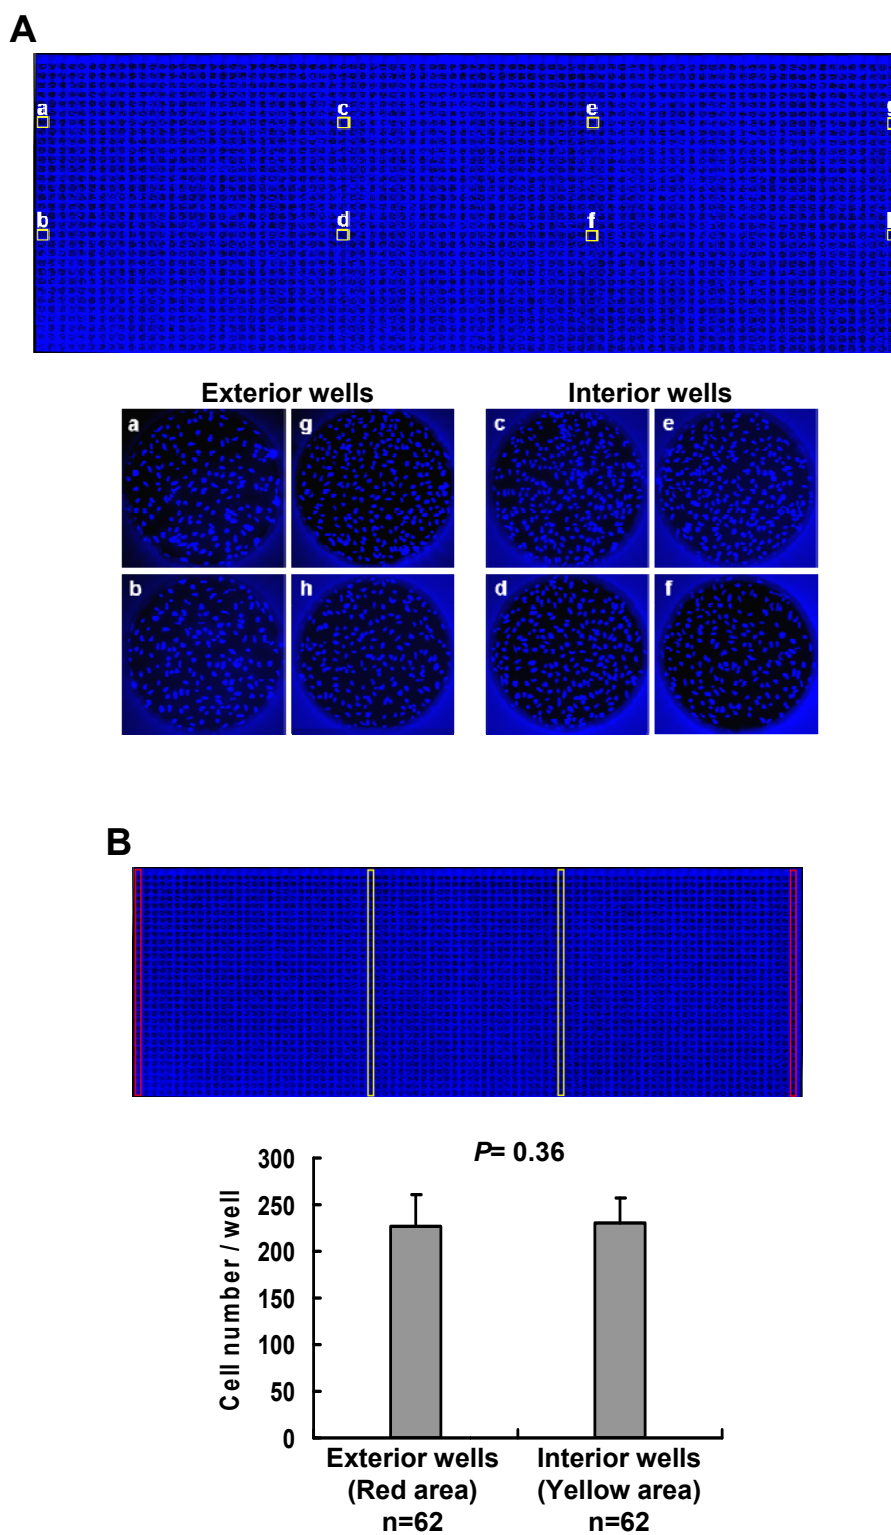

**Figure S3.** Consistencies of cell densities across the microwell array. (A) HeLa 229 cells cultured for 48 h in 2,666-microwells were labeled with Hoechst. (B) 62 wells selected from each exterior (in red box) and interior (in yellow box) region were analyzed for cell densities. No significant difference found in the two regions.

## Figure S4

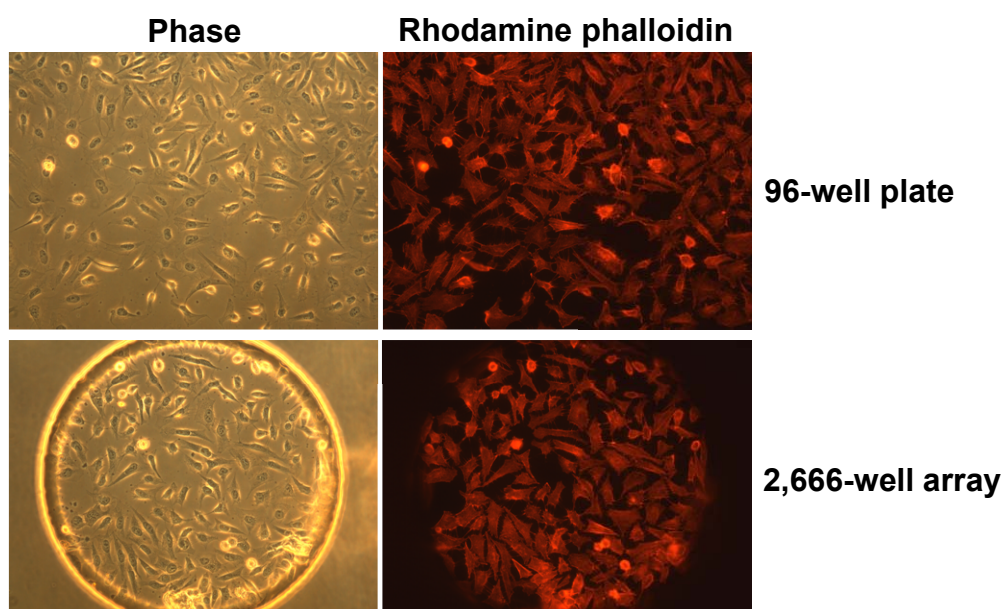

**Figure S4.** Cell morphology in a microwell array compared to a conventional 96-well microplate. HeLa 229 cells cultured for 24 h were immunolabeled by rhodamine phalloidin to determine the cell morphology. The phase-contrast and fluorescence images showed no visible difference between the two systems.

## Figure S5

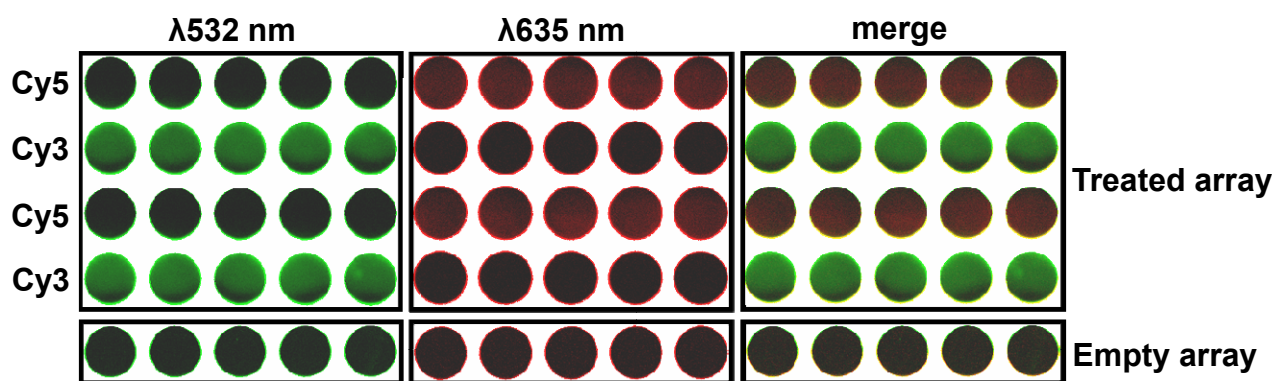

**Figure S5.** Segregation of fluids in microwells. Sequential rows of microcolumns coated with alternating soluble fluorescent dyes of Cy3 and Cy5 were inserted into microwells filled with cell culture medium for 1 h. Fluorescent images were photographed by an Axon Scanner.

**Table S1 Screen of EGFR phosphorylation inhibition for 79 compounds**

| Compound                                                         | Average of Intensity Ratio | Standard deviation | P value         | Compound                                         | Average of Intensity Ratio | Standard deviation | P value         |
|------------------------------------------------------------------|----------------------------|--------------------|-----------------|--------------------------------------------------|----------------------------|--------------------|-----------------|
| Mock                                                             | 0.85287                    | 0.02288            |                 | Acetylsalicylic acid                             | 0.83921                    | 0.02249            | 0.3041          |
| DL-alpha-Methyl-p-tyrosine                                       | 0.86563                    | 0.02653            | 0.3293          | Acetazolamide                                    | 0.83987                    | 0.03900            | 0.3659          |
| 6-Methoxy-1,2,3,4-tetrahydro-9H-pyrido[3,4b] indole              | 0.84231                    | 0.01616            | 0.3262          | Amperozide hydrochloride                         | 0.88226                    | 0.02502            | 0.1729          |
| Acetamide                                                        | 0.81549                    | 0.00999            | 0.112           | (±)-Nipecotinic acid                             | 0.87042                    | 0.01395            | 0.2345          |
| Amantadine hydrochloride                                         | 0.88046                    | 0.02300            | 0.176           | Atropine sulfate                                 | 0.89215                    | 0.00249            | 0.1227          |
| GABA                                                             | 0.87071                    | 0.05528            | 0.3656          | Gefitinib                                        | 0.37042                    | 0.01394            | <b>0.0019 *</b> |
| Gabaculine hydrochloride                                         | 0.81846                    | 0.00538            | 0.1332          | 3-aminobenzamide                                 | 0.88835                    | 0.01864            | 0.1181          |
| O-(Carboxymethyl) hydroxylamine                                  | 0.86848                    | 0.09091            | 0.4247          | N-Acetyl-5-hydroxytryptamine                     | 0.87058                    | 0.02407            | 0.2648          |
| (±)-2-Amino-7-phosphonoheptanoic acid                            | 0.82123                    | 0.00847            | 0.1376          | 5-(N-Ethyl-N-isopropyl)amiloride                 | 0.89420                    | 0.00677            | 0.108           |
| AG1478                                                           | 0.35411                    | 0.01840            | <b>0.0011 *</b> | AL-8810                                          | 0.87263                    | 0.00212            | 0.2177          |
| N-Acetylprocainamide hydrochloride                               | 0.86112                    | 0.02126            | 0.3724          | Amprilose hydrochloride                          | 0.86459                    | 0.01190            | 0.3022          |
| Actinonin                                                        | 0.88417                    | 0.05840            | 0.2926          | 5-(N-Methyl-N-isobutyl)amiloride                 | 0.87349                    | 0.03045            | 0.2645          |
| N-Phenylanthranilic acid                                         | 0.84176                    | 0.00798            | 0.308           | Arecoline hydrobromide                           | 0.90413                    | 0.00013            | 0.0973          |
| S-(4-Nitrobenzyl)-6-thioguanosine                                | 0.83720                    | 0.00569            | 0.2527          | Aminoguanidine hemisulfate                       | 0.85898                    | 0.03773            | 0.4331          |
| N-(4-Aminobutyl)-5-chloro-2-naphthalenesulfonamide hydrochloride | 0.82579                    | 0.02662            | 0.1957          | Azelaic acid                                     | 0.90313                    | 0.00631            | 0.089           |
| Aminophylline ethylenediamine                                    | 0.84998                    | 0.03189            | 0.4637          | Atropine methyl nitrate                          | 0.86821                    | 0.00277            | 0.2578          |
| 3'-Azido-3'-deoxythymidine                                       | 0.86590                    | 0.01239            | 0.2851          | (±)-Norepinephrine (+)bitartrate                 | 0.87013                    | 0.01947            | 0.2518          |
| AC 915 oxalate                                                   | 0.87820                    | 0.00434            | 0.1774          | Aurintricarboxylic acid                          | 0.86971                    | 0.02621            | 0.2827          |
| 5-(N,N-Dimethyl)amiloride hydrochloride                          | 0.83502                    | 0.02238            | 0.2564          | 3-Aminopropionitrile fumarate                    | 0.82673                    | 0.00878            | 0.1654          |
| (±)-2-Amino-5-phosphonopentanoic acid                            | 0.81908                    | 0.03462            | 0.1919          | 1-Aminobenzotriazole                             | 0.87201                    | 0.02348            | 0.248           |
| Sodium Taurocholate                                              | 0.83381                    | 0.02923            | 0.2735          | Alsterpaullone                                   | 0.87290                    | 0.01162            | 0.2084          |
| Methotrexate                                                     | 0.82598                    | 0.03445            | 0.2336          | Acetylthiocholine chloride                       | 0.86278                    | 0.05359            | 0.4206          |
| S(-)-p-Bromotetramisole oxalate                                  | 0.84578                    | 0.00312            | 0.3685          | A-315456                                         | 0.86322                    | 0.01744            | 0.3322          |
| TMB-8 hydrochloride                                              | 0.83983                    | 0.00521            | 0.2829          | Agmatine sulfate                                 | 0.88094                    | 0.02356            | 0.1752          |
| L-azetidine-2-carboxylic acid                                    | 0.82898                    | 0.04147            | 0.2836          | Tryptamine hydrochloride                         | 0.84347                    | 0.04137            | 0.4057          |
| S-(p-Azidophenacyl)glutathione                                   | 0.81032                    | 0.00810            | 0.1012          | Arcaïne sulfate                                  | 0.89371                    | 0.00789            | 0.1064          |
| Acetyl-beta-methylcholine chloride                               | 0.85989                    | 0.00163            | 0.3696          | 4-Amino-1,8-naphthalimide                        | 0.84614                    | 0.04711            | 0.439           |
| AA-861                                                           | 0.80810                    | 0.01103            | 0.0884          | (±)-2-Amino-4-phosphonobutyric acid              | 0.84151                    | 0.02923            | 0.3548          |
| Azathioprine                                                     | 0.79626                    | 0.00296            | 0.0861          | Apigenin                                         | 0.84841                    | 0.02342            | 0.4326          |
| L-732,138                                                        | 0.84267                    | 0.02463            | 0.3549          | 3-Amino-1-propanesulfonic acid sodium            | 0.85219                    | 0.00162            | 0.4867          |
| Amfostine                                                        | 0.86054                    | 0.03733            | 0.4157          | (±)-2-Amino-3-phosphonopropionic acid            | 0.85763                    | 0.02320            | 0.4277          |
| Atropine methyl bromide                                          | 0.86220                    | 0.04133            | 0.4062          | 4 Androsten 4 ol 3,17 dione                      | 0.89250                    | 0.00333            | 0.1204          |
| 5-Aminovaleric acid hydrochloride                                | 0.86554                    | 0.04853            | 0.3905          | GR 4661                                          | 0.88917                    | 0.01430            | 0.1106          |
| 4-Aminopyridine                                                  | 0.84603                    | 0.01296            | 0.3782          | 4-Aminobenzamidine dihydrochloride               | 0.87456                    | 0.01616            | 0.1992          |
| p-Aminoclonidine hydrochloride                                   | 0.86037                    | 0.00667            | 0.3623          | 5-Fluorindole-2-carboxylic acid                  | 0.86002                    | 0.01655            | 0.3787          |
| PP2                                                              | 0.45420                    | 0.02184            | <b>0.0016 *</b> | 1-Aminocyclopropanecarboxylic acid hydrochloride | 0.87275                    | 0.00092            | 0.2173          |
| Aminopterin                                                      | 0.82854                    | 0.00734            | 0.1789          | Reserpine                                        | 0.86676                    | 0.02318            | 0.3038          |
| 5-azacytidine                                                    | 0.83369                    | 0.04360            | 0.326           | N-arachidonylglycine                             | 0.84346                    | 0.04072            | 0.4043          |
| 9-Amino-1,2,3,4-tetrahydroacridine hydrochloride                 | 0.85410                    | 0.00628            | 0.4761          | Apomorphine hydrochloride hemihydrate            | 0.86400                    | 0.00537            | 0.3075          |
| Acyclovir                                                        | 0.85592                    | 0.02426            | 0.4545          | L-Arginine                                       | 0.85087                    | 0.02460            | 0.4704          |

\* P value < 0.05
